# Supplementary material
Source: PubMed Central journal article supplement (PMC6798402)
Supplement: S2059866118003138sup001.pdf [file S2059866118003138sup001.pdf]

## Pre-Symposium Survey

**Please select your primary affiliation(s) (select all that apply):**

- I am attending as a consumer or patient
- Community partner or patient advocate group
- Private health organization
- Private startup or technology company
- Non-profit organization
- Public sector
- Academic research institution
- Other: \_\_\_\_\_

**Please name the primary organization that you are affiliated with (list one):**

---

**If at an academic institution, please select your primary role (choose one):**

- Research Assistant
- Undergraduate Student
- Graduate Student (Masters or PhD)
- Postdoctoral Fellow
- Medical Resident
- Research Staff
- Early career faculty: Assistant or Associate Professor
- Senior faculty: Professor, Director, Chair
- Other: \_\_\_\_\_

**I have completed the following educational levels (select all that apply):**

- High School
- Bachelor's degree
- Master's degree
- PhD
- JD
- MD
- Other: \_\_\_\_\_

ID:

**My work directly uses techniques or principles from the following areas (select all that apply):**

- Statistics
- Machine Learning or other Predictive Modeling/Analysis Techniques
- Genetics
- Medical Imaging
- Biomarkers/Physiological
- Behavioral/Psychological
- Community and Patient Engagement
- Social Sciences (Sociology, Anthropology, History, Economics, Linguistics)
- Health Services/Implementation
- Health Quality
- Health Policy
- Clinical care
- Engineering
- Art & Design (including information visualization, HCI, etc)
- Other: \_\_\_\_\_

**I have recently or am actively collaborating directly with people in the following areas (select all that apply):**

- Statistics
- Machine Learning or other Predictive Modeling/Analysis Techniques
- Genetics
- Medical Imaging
- Biomarkers/Physiological
- Behavioral/Psychological
- Community and Patient Engagement
- Social Sciences (Sociology, Anthropology, History, Economics, Linguistics)
- Health Services/Implementation
- Health Quality
- Health Policy
- Clinical care
- Engineering
- Art & Design (including information visualization, HCI, etc)
- Other: \_\_\_\_\_

**My interests focus on (select all that apply)**

- Population health
- Individual patient level health
- Community Welfare
- Biological mechanisms

**I feel the most challenging aspect of my work is (select up to 3):**

- Relevance to clinical applications
- Connection to biological mechanisms
- Reproducibility of findings to other settings or projects
- Adherence by patients or communities
- Complexity of the data and computational techniques

- Data ownership/sharing issues
- Other: \_\_\_\_\_

**The main challenges to collaboration are (select up to 3):**

- Excessive time/effort required
- Distance or other physical barriers between collaborators
- Funding
- Identifying relevant individuals in other areas
- Regulatory/privacy issues
- Complexity of the data and/or computational techniques
- Data ownership/sharing issues
- Lack of perceived need to collaborate by others
- Other: \_\_\_\_\_

**Areas of Translational Research**

**T<sub>0</sub>** is characterized by the identification of opportunities and approaches to health problems.

**T<sub>1</sub>** seeks to move basic discovery into a candidate health application.

**T<sub>2</sub>** assesses the value of application for health practice leading to the development of evidence-based guidelines.

**T<sub>3</sub>** attempts to move evidence-based guidelines into health practice, through delivery, dissemination, and diffusion research.

**T<sub>4</sub>** seeks to evaluate the “real world” health outcomes of population health practice.

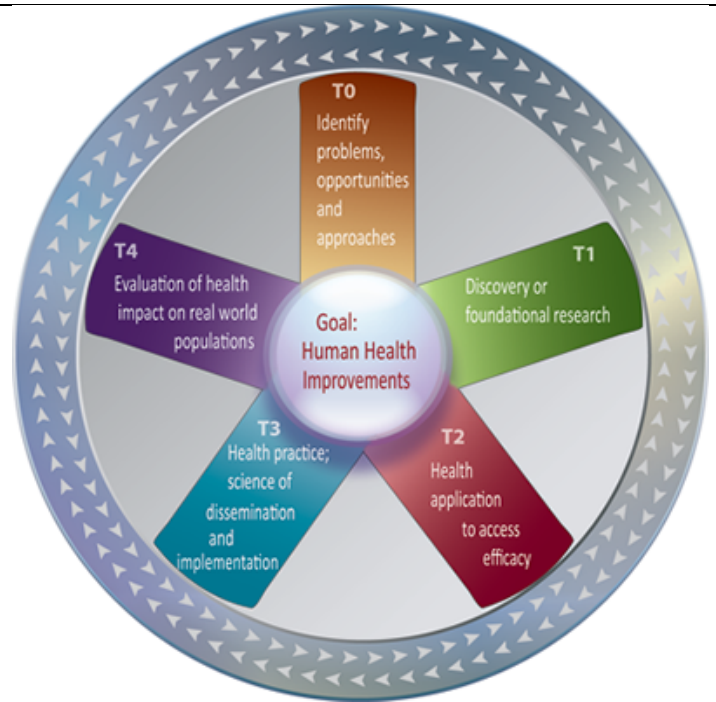

**I consider my work to be directly involved in the following stages of translational research (select all that apply):**

T0    -    T1    -    T2    -    T3    -    T4    -    N/A

**Please indicate how much you agree with the following statements:**

**1. It is important to involve patients and community organizations *prior* to identifying my research question or work objectives.**

|                   |          |         |       |                |
|-------------------|----------|---------|-------|----------------|
| 1                 | 2        | 3       | 4     | 5              |
| Strongly disagree | Disagree | Neutral | Agree | Strongly agree |

**2. I feel I understand the principles behind community-partnered participatory techniques and how to apply them in my work.**

|                   |          |         |       |                |
|-------------------|----------|---------|-------|----------------|
| 1                 | 2        | 3       | 4     | 5              |
| Strongly disagree | Disagree | Neutral | Agree | Strongly agree |

**3. I will likely integrate community-partnered participatory techniques at early stages in my future projects.**

|                   |          |         |       |                |
|-------------------|----------|---------|-------|----------------|
| 1                 | 2        | 3       | 4     | 5              |
| Strongly disagree | Disagree | Neutral | Agree | Strongly agree |

**I am interested in forming collaborations with people in the following areas (select all that apply):**

- Statistics
- Machine Learning or other Predictive Modeling/Analysis Techniques
- Genetics
- Medical Imaging
- Biomarkers/Physiological
- Behavioral/Psychological
- Community and Patient Engagement
- Social Sciences (Sociology, Anthropology, History, Economics, Linguistics)
- Health Services/Implementation
- Health Quality
- Health Policy
- Clinical care
- Engineering
- Art & Design (including information visualization, HCI, etc)
- Other: \_\_\_\_\_

**I am most interested in getting out of the day:**

ID:

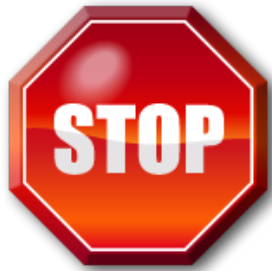

**Please stop here.**

**Thank you for completing the first part of the survey.**

**Please do not complete the survey on the following page until today's  
symposium has concluded.**

## Post-Symposium Survey

**Please indicate how much you agree with the following statements:**

**1. It is important to involve patients and community organizations *prior* to identifying my research question or work objectives.**

|                   |          |         |       |                |
|-------------------|----------|---------|-------|----------------|
| 1                 | 2        | 3       | 4     | 5              |
| Strongly disagree | Disagree | Neutral | Agree | Strongly agree |

**2. I feel I understand the principles behind community-partnered participatory techniques and how to apply them in my work.**

|                   |          |         |       |                |
|-------------------|----------|---------|-------|----------------|
| 1                 | 2        | 3       | 4     | 5              |
| Strongly disagree | Disagree | Neutral | Agree | Strongly agree |

**3. I will likely integrate community-partnered participatory techniques at early stages in my future projects.**

|                   |          |         |       |                |
|-------------------|----------|---------|-------|----------------|
| 1                 | 2        | 3       | 4     | 5              |
| Strongly disagree | Disagree | Neutral | Agree | Strongly agree |

**4. I found this symposium helpful and plan to integrate lessons learned today in my work.**

|                   |          |         |       |                |
|-------------------|----------|---------|-------|----------------|
| 1                 | 2        | 3       | 4     | 5              |
| Strongly disagree | Disagree | Neutral | Agree | Strongly agree |

**I am interested in forming collaborations with people in the following areas (select all that apply):**

- Statistics
- Machine Learning or other Predictive Modeling/Analysis Techniques
- Genetics
- Medical Imaging
- Biomarkers/Physiological
- Behavioral/Psychological
- Community and Patient Engagement
- Social Sciences (Sociology, Anthropology, History, Economics, Linguistics)
- Health Services/Implementation
- Health Quality
- Health Policy
- Clinical care
- Engineering
- Art & Design (including information visualization, HCI, etc)
- Other: \_\_\_\_\_

**I feel the main take-home points of the day for me are:**

ID:

| I have <b>met and interacted</b> with this person <i>before</i> the symposium | I have previously <b>collaborated directly</b> with this individual | I would be interested in <b>forming a new collaboration</b> |                                              |
|-------------------------------------------------------------------------------|---------------------------------------------------------------------|-------------------------------------------------------------|----------------------------------------------|
|                                                                               |                                                                     |                                                             | Adhikari, Sam - Sysoft Corporation           |
|                                                                               |                                                                     |                                                             | Anderson, Ariana - UCLA                      |
|                                                                               |                                                                     |                                                             | Arevian, Armen - UCLA                        |
|                                                                               |                                                                     |                                                             | Arevian, Sarkis – Memorial Counseling Assoc. |
|                                                                               |                                                                     |                                                             | Baldwin, Kevin - UCLA                        |
|                                                                               |                                                                     |                                                             | Banerjee, Pia – UCLA                         |
|                                                                               |                                                                     |                                                             | Bari, Ausaf - UCLA                           |
|                                                                               |                                                                     |                                                             | Bell, Douglas - UCLA                         |
|                                                                               |                                                                     |                                                             | Black, Matthew - Behavioral Informatics, LLC |
|                                                                               |                                                                     |                                                             | Boicey, Charles - UC Irvine                  |
|                                                                               |                                                                     |                                                             | Carreon, David - Stanford                    |
|                                                                               |                                                                     |                                                             | Chatzopoulou, Doxa - UCLA                    |
|                                                                               |                                                                     |                                                             | Chung Ho, King - UCLA                        |
|                                                                               |                                                                     |                                                             | Chung, Bowen - UCLA/RAND                     |
|                                                                               |                                                                     |                                                             | Coppola, Giovanni - UCLA                     |
|                                                                               |                                                                     |                                                             | Crisman, Thomas - UCLA                       |
|                                                                               |                                                                     |                                                             | Crowley, Christopher - West Health Institute |
|                                                                               |                                                                     |                                                             | Dahm, Lisa - UC Irvine                       |
|                                                                               |                                                                     |                                                             | Dangle, Stephanie – University of Pittsburgh |
|                                                                               |                                                                     |                                                             | Di Capua, Paul - UCLA                        |
|                                                                               |                                                                     |                                                             | Doctor, Jason - USC                          |
|                                                                               |                                                                     |                                                             | Eichstaedt, Johannes - UPenn                 |
|                                                                               |                                                                     |                                                             | Eisenman, David - UCLA                       |
|                                                                               |                                                                     |                                                             | Franc, Dan - UCLA                            |
|                                                                               |                                                                     |                                                             | Fu, Paul Jr. - UCLA                          |
|                                                                               |                                                                     |                                                             | Glik, Deborah - UCLA                         |
|                                                                               |                                                                     |                                                             | Gratch, Jonathan - USC                       |
|                                                                               |                                                                     |                                                             | Gray, Joshua L - USC                         |
|                                                                               |                                                                     |                                                             | Gulesserian, Sevan Koko - UC Irvine          |
|                                                                               |                                                                     |                                                             | Haidarian, Hamid - UCLA                      |
|                                                                               |                                                                     |                                                             | Hondori, Hossein Mousavi - UC Irvine         |
|                                                                               |                                                                     |                                                             | Hsu, William - UCLA                          |
|                                                                               |                                                                     |                                                             | Jiang, Xiaoqian - UCSD                       |
|                                                                               |                                                                     |                                                             | Kale, David - USC                            |
|                                                                               |                                                                     |                                                             | Keener, Matthew - Emotd                      |
|                                                                               |                                                                     |                                                             | Kerner, Berit - UCLA                         |
|                                                                               |                                                                     |                                                             | Kesselman, Carl - USC                        |
|                                                                               |                                                                     |                                                             | Kim, Katherine - SFSU                        |

ID:

| I have <b>met and interacted</b> with this person <i>before</i> the symposium | I have previously <b>collaborated directly</b> with this individual | I would be interested in <b>forming a new collaboration</b> | Komek, Kubra - Carnegie Mellon University    |
|-------------------------------------------------------------------------------|---------------------------------------------------------------------|-------------------------------------------------------------|----------------------------------------------|
|                                                                               |                                                                     |                                                             | Kretzmann, Mark - UCLA                       |
|                                                                               |                                                                     |                                                             | Kurz, Raluca - UCLA                          |
|                                                                               |                                                                     |                                                             | Lawrence Ham - Binary Health                 |
|                                                                               |                                                                     |                                                             | Liu, Brent J. - USC                          |
|                                                                               |                                                                     |                                                             | Luo, John - UCLA                             |
|                                                                               |                                                                     |                                                             | Mahajan, Anish - LADHS                       |
|                                                                               |                                                                     |                                                             | Mankodiya, Kunal - CMU                       |
|                                                                               |                                                                     |                                                             | Massoumi, Sanaz - USC                        |
|                                                                               |                                                                     |                                                             | Mazefsky, Carla – University of Pittsburgh   |
|                                                                               |                                                                     |                                                             | McGraw, Deven - CDT                          |
|                                                                               |                                                                     |                                                             | Meeker, Daniella - RAND                      |
|                                                                               |                                                                     |                                                             | Narayanan, Shrikanth - USC                   |
|                                                                               |                                                                     |                                                             | Ogunyemi, Omolola - CDU                      |
|                                                                               |                                                                     |                                                             | Ohno-Machado, Lucila - UCSD                  |
|                                                                               |                                                                     |                                                             | Pevnick, Josh - Cedars-Sinai Health System   |
|                                                                               |                                                                     |                                                             | Pirnia, Tara - UCLA                          |
|                                                                               |                                                                     |                                                             | Proffitt, Rachel - USC                       |
|                                                                               |                                                                     |                                                             | Rahimi, Mansour - USC                        |
|                                                                               |                                                                     |                                                             | Ramchandani, Manisha Harish - UCLA           |
|                                                                               |                                                                     |                                                             | Rezaeian, Panteha - UCLA                     |
|                                                                               |                                                                     |                                                             | Rios Piedra, Edgar A - UCLA                  |
|                                                                               |                                                                     |                                                             | Riveros, Toni - UCLA                         |
|                                                                               |                                                                     |                                                             | Rotter, Jerome I - UCLA                      |
|                                                                               |                                                                     |                                                             | Shah, Anand - University of Texas            |
|                                                                               |                                                                     |                                                             | Shih, Wendy - UCLA                           |
|                                                                               |                                                                     |                                                             | Singleton, Kyle W. - UCLA                    |
|                                                                               |                                                                     |                                                             | Spitale, Brett – Autism Speaks               |
|                                                                               |                                                                     |                                                             | Stone, Terrence - First African Presb Church |
|                                                                               |                                                                     |                                                             | Strouse, Tom - UCLA                          |
|                                                                               |                                                                     |                                                             | Suchard, Marc - UCLA                         |
|                                                                               |                                                                     |                                                             | Tong, Maurine - UCLA                         |
|                                                                               |                                                                     |                                                             | Wells, Kenneth B. - UCLA/RAND                |
|                                                                               |                                                                     |                                                             | Wiesner, Sid - Wellbridge Health             |
|                                                                               |                                                                     |                                                             | Wojnowicz, Mike - UC Irvine                  |
|                                                                               |                                                                     |                                                             | Wu, Allan - UCLA                             |
|                                                                               |                                                                     |                                                             | Yoseloff, Lee - Memorial Psychiatric Health  |



ID:

|  |  |  |  |
|--|--|--|--|
|  |  |  |  |
|  |  |  |  |
